# Supplementary material for: Self-assembly of block copolymer-based ionic supramolecules based upon multi-tail amphiphiles
Source: Royal Society of Chemistry journal article supplement (doi:10.1039/c5ra03220b), 2015-01-01
Supplement: c5ra03220b1.pdf [file c5ra03220b1.pdf]

## Supplementary Information

### Self-assembly of block copolymer-based ionic supramolecules based upon multi-tail amphiphiles

M. Asad Ayoubi,<sup>\*a</sup> K. Almdal,<sup>b</sup> K. Zhu,<sup>c</sup> B. Nyström,<sup>c</sup> U. Olsson,<sup>a</sup> and L. Piculell<sup>a</sup>

<sup>a</sup> Division of Physical Chemistry, Center for Chemistry and Chemical Engineering, Lund University, SE-22 100 Lund, Sweden.

<sup>b</sup> Department of Micro- and nanotechnology, Technical University of Denmark, DTU Nanotech, Building 423, DK-2800 Kongens Lyngby, Denmark.

<sup>c</sup> Department of Chemistry, University of Oslo, P.O. Box 1033, Blindern, N-0315 Oslo, Norway.

#### 1. Form-factor simulation of a cylinder

Form factor of a cylinder  $P(q)$  is<sup>1</sup>

$$P(q, R, L) = \int_0^{\pi/2} f^2(q, \beta) \sin \beta d\beta \quad (\text{SI-1})$$
$$f(q, \beta) = 8\pi R^2 L j_0\left(\frac{qL}{2} \beta\right) \frac{j_1(qR \sin \beta)}{qR \sin \beta}$$

, where  $j_0(x) = \sin x/x$ ,  $j_1(x)$  is the first order Bessel function,  $R$  is the radius of the cylinder,  $L$  is its length and  $\beta$  is the angle between the cylinder axis and the  $q$ -vector. Thus, in eqn. SI-1 the cylinder form factor is an average over all possible orientations of the cylinder with respect to the  $q$ -vector. We have used Irena SAXS analysis package<sup>2</sup> that has implemented the code for  $P(q)$ . The results are shown in Figure 3, c-e, of the paper.

#### 2. SAXS modeling of SPH<sub>LL</sub> microdomains

The scattering intensity  $I(q)$  of a collection of spheres (which in our case represent the micro-segregated AC-block domains) is compared to the experimental scattering pattern and the characteristics of the system is determined as extracted fitting parameters. The intensity is related to intra-particle (i.e. form-factor) scattering  $P'(q)$  and inter-particle (i.e. structure factor) scattering  $S(q)$  in the following manner:<sup>3</sup>

$$I(q) \sim P'(q)S(q) \quad (\text{SI-2})$$

$P'(q)$  for a system of spheres (radius  $R$ ) is

$$P'(q, R) = \left(\frac{4}{3} \pi R^3\right)^2 \left(\frac{3[\sin(qR) - qR \cos(qR)]}{(qR)^3}\right)^2 \quad (\text{SI-3})$$

In order to account for polydispersity in size of spheres we convolute  $P'(q, R)$  with a Gaussian function  $p(R)$  with a standard deviation of  $\kappa$ . Thus we have

$$P'(q, \bar{R}, \kappa) = \frac{\int_0^\infty P'(q, R) p(R) dR}{\int_0^\infty p(R) dR} \quad (\text{SI-4})$$

$$p(R) = A \exp\left[-\frac{(R - \bar{R})^2}{2\kappa^2}\right] \quad (\text{SI-5})$$

,  $\bar{R}$  being the average radius of the spheres. For  $S(q)$  we have assumed a hard-sphere Percus-Yevick potential between the spherical microdomains for the sake of simplicity. It is based on the Ornstein-Zernike formulation of the total correlation function of particles in terms of direct pair correlation and indirect correlation.<sup>4</sup> Percus and

Yevick calculated analytically this total correlation function for a short-range hard-sphere potential between the particles.<sup>5</sup> The final expression for  $S(q)$  for an effective hard sphere radius  $R_{hs}$  and an effective hard sphere volume fraction  $\Phi_{hs}$  reads as<sup>6, 7</sup>

$$S(q, R_{hs}, \Phi_{hs}) = \frac{1}{1 + 24\Phi_{hs} \left( \frac{G(A)}{A} \right)}$$

$$G(A) = \frac{\alpha}{A^2} (\sin A - A \cos A) + \frac{\beta}{A^3} (2A \sin A + (2 - A^2) \cos A - 2) + \frac{\gamma}{A^5} (-A^4 \cos A + 4[(3A^2 - 6) \cos A + (A^3 - 6A) \sin A + 6]) \quad (\text{SI-6})$$

$$\alpha = \frac{(1 + 2\Phi_{hs})^2}{(1 - \Phi_{hs})^4}, \quad \beta = -6\Phi_{hs} \frac{\left(1 + \frac{\Phi_{hs}}{2}\right)^2}{(1 - \Phi_{hs})^4}, \quad \gamma = \frac{\Phi_{hs} (1 + 2\Phi_{hs})^2}{2(1 - \Phi_{hs})^4},$$

$$A = 2qR_{hs}$$

The scattering intensity of the above mentioned model is compared with scattering curves of S-MAA-8-M/(C12)<sub>2</sub>/X ( $0.1 \leq X \leq 0.5$ ). Very good agreement between the model and the experimental data is obtained (see Figure 5, a-e, of the paper). The extracted values for the average radius of the (AC-block)-filled spherical microdomains  $R'_{AC}$  ( $= \bar{R}$  in eqns. SI-4 and SI-5),  $\kappa$ ,  $R_{hs}$ , and  $\Phi_{hs}$  are presented in Table SI-1.

**Table SI-1.**

| sample                            | $R'_{AC}$ (Å) | $\kappa$ (Å) | $R_{hs}$ [ $\pm 5$ (Å)] | $\Phi_{hs}$ ( $\pm 0.05$ ) |
|-----------------------------------|---------------|--------------|-------------------------|----------------------------|
| S-MAA-8-M/(C12) <sub>2</sub> /0.1 | 68            | 12           | 122                     | 0.47                       |
| S-MAA-8-M/(C12) <sub>2</sub> /0.2 | 69            | 13           | 122                     | 0.46                       |
| S-MAA-8-M/(C12) <sub>2</sub> /0.3 | 72            | 14           | 121                     | 0.45                       |
| S-MAA-8-M/(C12) <sub>2</sub> /0.4 | 80            | 11           | 126                     | 0.47                       |
| S-MAA-8-M/(C12) <sub>2</sub> /0.5 | 74            | 14           | 133                     | 0.48                       |

### 3. Nano-segregated state

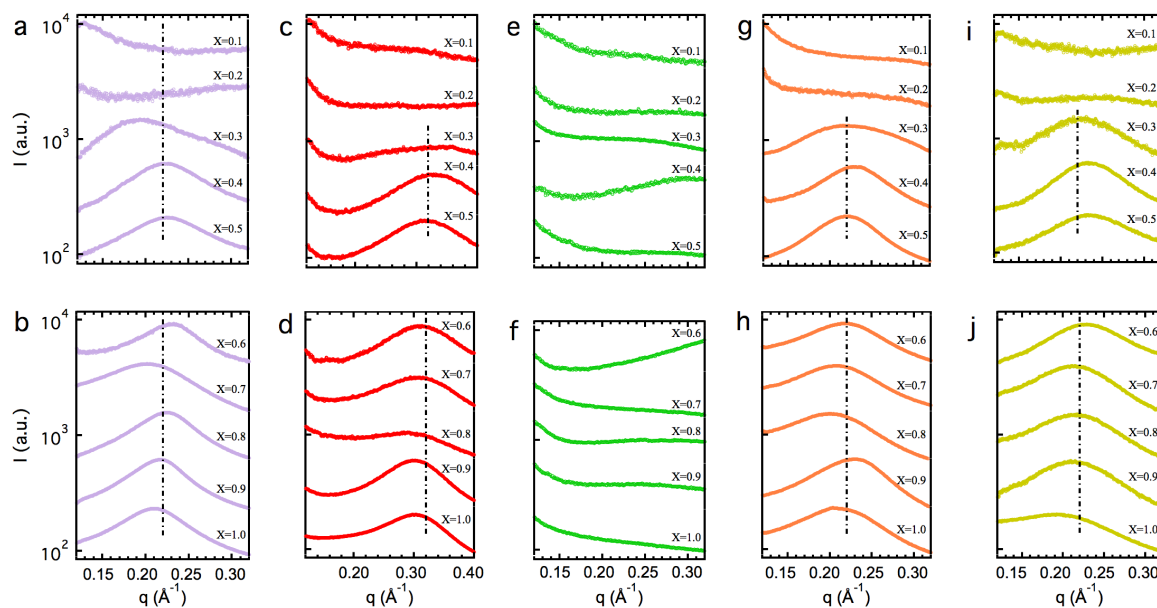

**Figure SI-1.** SAXS patterns of [(a) and (b)] S-MAA-15/(C12)<sub>2</sub>/X, [(c) and (d)] S-MAA-15/(C8)<sub>2</sub>/X, [(e) and (f)] S-MAA-15/(C8)<sub>4</sub>/X, [(g) and (h)] S-MAA-17-M/(C12)<sub>2</sub>/X, and [(i) and (j)] S-MAA-8-M/(C12)<sub>2</sub>/X. In (a)-(d) and (g)-(j) dashed-dotted lines are the approximate positions of the broad peak.

### References

- 1 A. Guinier and G. Fournet, *Small-Angle Scattering of X-rays*, John Wiley & Sons, 1955.
- 2 J. Ilavsky and P. R. Jemian, *J. Appl. Crystallogr.*, 2009, **42**, 347-353.
- 3 D. J. Kinning and E. L. Thomas, *Macromolecules*, 1984, **17**, 1712-1718.
- 4 L. S. Ornstein and F. Zernike, *Proc. Acad. Sci. Amsterdam*, 1914, **17**, 793-806.
- 5 J. K. Percus and G. J. Yevick, *Physical Review*, 1958, **110**, 1-13.
- 6 N. W. Ashcroft and J. Lekner, *Phys. Rev.*, 1966, **145**, 83-90.
- 7 E. W. Kaler, K. E. Bennett, H. T. Davis and L. E. Scriven, *J. Chem. Phys.*, 1983, **79**, 5673-5684.
